# Supplementary material for: T3DB: an integrated database for bacterial type III secretion system
Source: Springer Nature journal article supplement (doi:10.1186/1471-2105-13-66), 2012-04-30
Supplement: 12859_2011_5282_MOESM1_ESM.pdf [file 12859_2011_5282_MOESM1_ESM.pdf]

## A. Procedure for T3DB construction

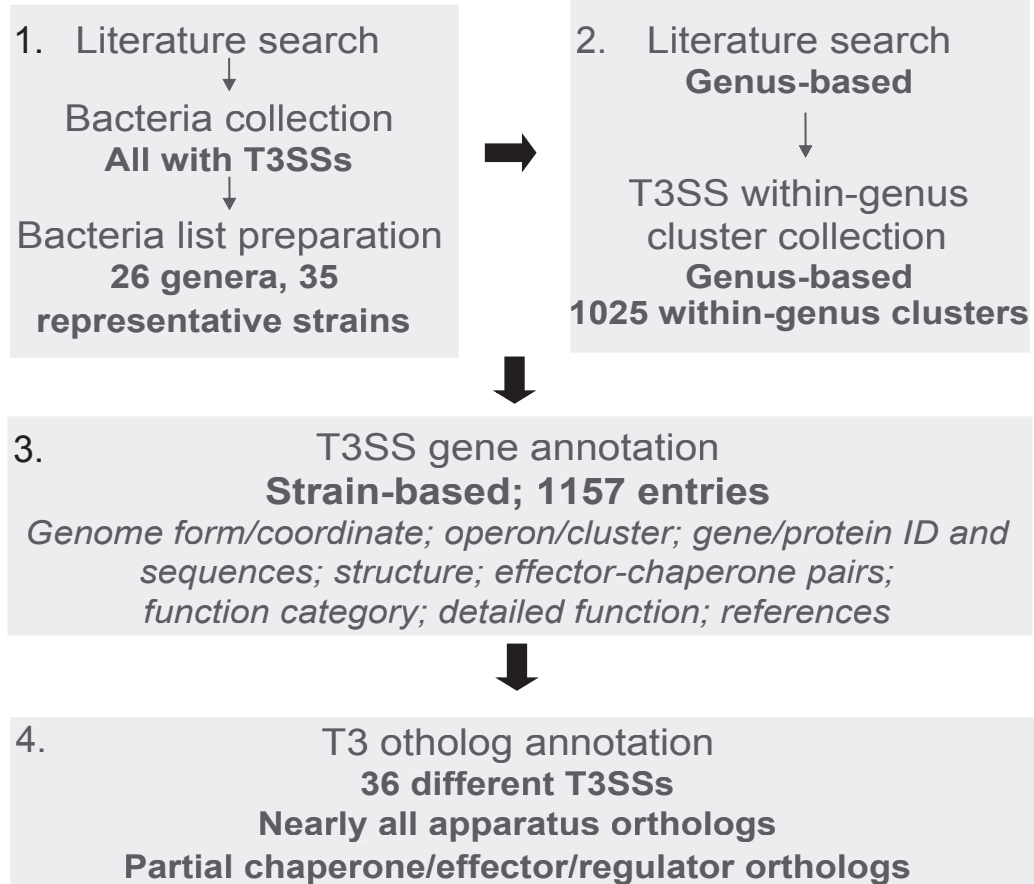

## B. T3SS gene categorization

### Category I. Apparatus

Outer membrane ring  
*eg. InvG/YscC*

Inner membrane ring  
*eg. PrgK/YscJ*

Cytoplasmic ring  
*eg. SpaO/YscQ*

Export apparatus  
*eg. SpaP/YscR*

Needle assembly  
*eg. InvI/YscO*

Needle major subunit  
*eg. PrgI/YscF*

Needle minor subunit  
*eg. PrgJ/YscI*

Translocon  
*eg. SipB/YopB*

ATPase  
*eg. InvC/YscN*

Effector export  
*eg. InvE/YopN*

### Category II. Chaperone

### Category III. Effector

### Category IV. Transcription regulator
